# Supplementary material
Source: PubMed Central journal article supplement (PMC4098838)
Supplement: NIHMS501994-supplement-supplemental.pdf [file NIHMS501994-supplement-supplemental.pdf]

## 7. Supplement

List of genotyped SNPs on 21 candidate genes using the Affymetrix Genome-wide Human SNP Array 6.0.

| Gene  | RS-number  | Chromosome | Physical Position |
|-------|------------|------------|-------------------|
| MTHFR | rs4845882  | 1          | 11765754          |
|       | rs4846048  | 1          | 11768839          |
|       | rs1801131  | 1          | 11777063          |
|       | rs12121543 | 1          | 11777258          |
|       | rs9651118  | 1          | 11784801          |
|       | rs17367504 | 1          | 11785365          |
| IRF6  | rs2235372  | 1          | 208027059         |
|       | rs742215   | 1          | 208027646         |
|       | rs17317411 | 1          | 208027937         |
|       | rs674433   | 1          | 208031498         |
|       | rs2235375  | 1          | 208032210         |
|       | rs17015218 | 1          | 208034538         |
|       | rs2013196  | 1          | 208035034         |
|       | rs7552506  | 1          | 208036525         |
|       | rs17015226 | 1          | 208036719         |
|       | rs7555285  | 1          | 208036978         |
|       | rs2236908  | 1          | 208038263         |
|       | rs2236909  | 1          | 208038278         |
|       | rs6540560  | 1          | 208048696         |
|       | rs630984   | 1          | 208048916         |
|       | rs6696825  | 1          | 208048995         |
|       | rs17015255 | 1          | 208049361         |
| MTR   | rs10495384 | 1          | 235027978         |
|       | rs10733117 | 1          | 235030490         |
|       | rs10733118 | 1          | 235030633         |
|       | rs2185208  | 1          | 235034979         |
|       | rs7526063  | 1          | 235038621         |
|       | rs4659731  | 1          | 235079996         |
|       | rs7516758  | 1          | 235081234         |
|       | rs4456082  | 1          | 235081249         |
|       | rs2275568  | 1          | 235082251         |
|       | rs2385500  | 1          | 235083531         |
|       | rs10802568 | 1          | 235094708         |
|       | rs2275566  | 1          | 235115185         |
|       | rs2275565  | 1          | 235115299         |
|       | rs16834510 | 1          | 235116052         |
|       | rs10158822 | 1          | 235116799         |
|       | rs10158222 | 1          | 235117305         |
|       | rs1266164  | 1          | 235117574         |
|       | rs16834516 | 1          | 235118419         |
|       | rs12094071 | 1          | 235118656         |
|       | rs10925261 | 1          | 235119809         |

|      |            |   |           |
|------|------------|---|-----------|
|      | rs3768152  | 1 | 235120153 |
|      | rs3768155  | 1 | 235120345 |
|      | rs16834521 | 1 | 235121192 |
|      | rs1252252  | 1 | 235122625 |
|      | rs10737812 | 1 | 235125451 |
|      | rs16834527 | 1 | 235125821 |
|      | rs4659743  | 1 | 235126010 |
|      | rs4659745  | 1 | 235126130 |
|      | rs2275564  | 1 | 235126684 |
|      | rs3768159  | 1 | 235129036 |
|      | rs6679990  | 1 | 235131853 |
|      | rs16834539 | 1 | 235132861 |
| TGFA | rs11466307 | 2 | 70527498  |
|      | rs10496180 | 2 | 70527562  |
|      | rs11466306 | 2 | 70527660  |
|      | rs11466304 | 2 | 70527741  |
|      | rs3771527  | 2 | 70528090  |
|      | rs7606793  | 2 | 70537572  |
|      | rs930655   | 2 | 70537959  |
|      | rs1880039  | 2 | 70540560  |
|      | rs6729950  | 2 | 70543642  |
|      | rs3771516  | 2 | 70548391  |
|      | rs7578860  | 2 | 70548697  |
|      | rs17005672 | 2 | 70561704  |
|      | rs17005682 | 2 | 70565115  |
|      | rs7561997  | 2 | 70569556  |
|      | rs2902345  | 2 | 70570107  |
|      | rs17005706 | 2 | 70570535  |
|      | rs3821262  | 2 | 70574514  |
|      | rs11466229 | 2 | 70576271  |
|      | rs4852620  | 2 | 70576454  |
|      | rs3849385  | 2 | 70576556  |
|      | rs3771496  | 2 | 70577053  |
|      | rs3771492  | 2 | 70582385  |
|      | rs3821261  | 2 | 70582761  |
|      | rs3755377  | 2 | 70586360  |
|      | rs404420   | 2 | 70587034  |
|      | rs7582571  | 2 | 70587296  |
|      | rs13401501 | 2 | 70594757  |
|      | rs13401694 | 2 | 70594893  |
|      | rs11466220 | 2 | 70595602  |
|      | rs10198315 | 2 | 70595681  |
|      | rs414399   | 2 | 70596820  |
|      | rs2863689  | 2 | 70597102  |
|      | rs4464299  | 2 | 70597409  |
|      | rs13415412 | 2 | 70604161  |
|      | rs17005803 | 2 | 70604511  |

|       |            |   |           |
|-------|------------|---|-----------|
|       | rs6708768  | 2 | 70605703  |
|       | rs453870   | 2 | 70605851  |
|       | rs378322   | 2 | 70616413  |
|       | rs432203   | 2 | 70618196  |
|       | rs377122   | 2 | 70620533  |
|       | rs1523300  | 2 | 70622873  |
|       | rs10489984 | 2 | 70625963  |
|       | rs11466191 | 2 | 70633589  |
| SATB2 | rs260761   | 2 | 199841435 |
|       | rs6735905  | 2 | 199855499 |
|       | rs4673309  | 2 | 199855654 |
|       | rs10497832 | 2 | 199875181 |
|       | rs11891161 | 2 | 199875818 |
|       | rs1374361  | 2 | 199878979 |
|       | rs4675475  | 2 | 199884288 |
|       | rs7569519  | 2 | 199888067 |
|       | rs7596078  | 2 | 199888088 |
|       | rs930616   | 2 | 199894160 |
|       | rs13002186 | 2 | 199897725 |
|       | rs17197938 | 2 | 199908430 |
|       | rs3828186  | 2 | 199922518 |
|       | rs7575191  | 2 | 199930423 |
|       | rs10497834 | 2 | 199934212 |
|       | rs16831370 | 2 | 199939292 |
|       | rs13406992 | 2 | 199944386 |
|       | rs1348812  | 2 | 199944670 |
|       | rs1348813  | 2 | 199953490 |
|       | rs10497836 | 2 | 199996963 |
|       | rs895882   | 2 | 200011260 |
|       | rs13392032 | 2 | 200017738 |
|       | rs13422914 | 2 | 200024373 |
|       | rs6736601  | 2 | 200028263 |
| SUMO1 | rs10931992 | 2 | 202774664 |
|       | rs10185956 | 2 | 202790487 |
|       | rs10931993 | 2 | 202815985 |
| CHRD  | rs13084750 | 3 | 185577418 |
| FGFR3 | rs3860717  | 4 | 1761816   |
|       | rs746779   | 4 | 1763081   |
| MSX1  | rs3775261  | 4 | 4914646   |
|       | rs1042484  | 4 | 4915282   |
|       | rs4464513  | 4 | 4918223   |
| FGF2  | rs308392   | 4 | 123965061 |
|       | rs308394   | 4 | 123966333 |
|       | rs308395   | 4 | 123966392 |
|       | rs366192   | 4 | 123969401 |
|       | rs308412   | 4 | 123971467 |
|       | rs308416   | 4 | 123988076 |

|       |            |   |           |
|-------|------------|---|-----------|
|       | rs308413   | 4 | 123989039 |
|       | rs308434   | 4 | 123991278 |
|       | rs308435   | 4 | 123991468 |
|       | rs11938826 | 4 | 123992064 |
|       | rs308439   | 4 | 123993029 |
|       | rs17473132 | 4 | 123995981 |
|       | rs17407577 | 4 | 123998791 |
|       | rs17006219 | 4 | 124001646 |
|       | rs6854081  | 4 | 124036157 |
|       | rs7683093  | 4 | 124037535 |
|       | rs1476217  | 4 | 124037961 |
| MTRR  | rs1893579  | 5 | 7917354   |
|       | rs8752809  | 5 | 7918567   |
|       | rs17184211 | 5 | 7919106   |
|       | rs47208168 | 5 | 7919764   |
|       | rs1334589  | 5 | 7920067   |
|       | rs4272909  | 5 | 7920971   |
|       | rs5280202  | 5 | 7921156   |
|       | rs12820537 | 5 | 7934678   |
|       | rs7803651  | 5 | 7938961   |
|       | rs5610175  | 5 | 7951089   |
|       | rs10983512 | 5 | 7959011   |
| FGF10 | rs6451758  | 5 | 44341272  |
|       | rs10462070 | 5 | 44341506  |
|       | rs17234541 | 5 | 44344655  |
|       | rs1839090  | 5 | 44349039  |
|       | rs17316984 | 5 | 44351131  |
|       | rs980510   | 5 | 44354289  |
|       | rs10057630 | 5 | 44363621  |
|       | rs4866891  | 5 | 44364027  |
|       | rs987642   | 5 | 44367662  |
|       | rs983374   | 5 | 44370740  |
|       | rs12517396 | 5 | 44395283  |
|       | rs339509   | 5 | 44396649  |
|       | rs17234079 | 5 | 44397961  |
|       | rs1482672  | 5 | 44398526  |
|       | rs339502   | 5 | 44399764  |
|       | rs11750845 | 5 | 44408817  |
|       | rs1384449  | 5 | 44412817  |
|       | rs16901816 | 5 | 44417455  |
|       | rs2973643  | 5 | 44417818  |
|       | rs2973649  | 5 | 44426918  |
|       | rs1482680  | 5 | 44427899  |
|       | rs7718704  | 5 | 44428734  |
|       | rs10512852 | 5 | 44429326  |
| ESR1  | rs867240   | 6 | 152170335 |
|       | rs3844508  | 6 | 152181735 |

|            |   |           |
|------------|---|-----------|
| rs9371557  | 6 | 152181902 |
| rs12523770 | 6 | 152183315 |
| rs6917746  | 6 | 152184649 |
| rs9340788  | 6 | 152185082 |
| rs2234693  | 6 | 152205028 |
| rs3853252  | 6 | 152211940 |
| rs4870057  | 6 | 152213591 |
| rs9340817  | 6 | 152216799 |
| rs1709182  | 6 | 152217050 |
| rs712221   | 6 | 152221934 |
| rs9340831  | 6 | 152224306 |
| rs2431260  | 6 | 152234024 |
| rs1709183  | 6 | 152235689 |
| rs11155819 | 6 | 152241052 |
| rs9322335  | 6 | 152241822 |
| rs9322336  | 6 | 152242123 |
| rs9340838  | 6 | 152242202 |
| rs9340844  | 6 | 152243317 |
| rs11155820 | 6 | 152245903 |
| rs9322341  | 6 | 152266429 |
| rs7772475  | 6 | 152268615 |
| rs9340877  | 6 | 152268641 |
| rs9397453  | 6 | 152278572 |
| rs4870061  | 6 | 152279161 |
| rs4458702  | 6 | 152282116 |
| rs988328   | 6 | 152282843 |
| rs2347868  | 6 | 152293261 |
| rs9371562  | 6 | 152302335 |
| rs4583998  | 6 | 152302361 |
| rs1884051  | 6 | 152324972 |
| rs2982694  | 6 | 152327380 |
| rs9383951  | 6 | 152337306 |
| rs3020327  | 6 | 152343338 |
| rs2144025  | 6 | 152349399 |
| rs12664544 | 6 | 152350666 |
| rs13216134 | 6 | 152370177 |
| rs1569788  | 6 | 152370309 |
| rs9397074  | 6 | 152371408 |
| rs9340955  | 6 | 152371894 |
| rs9340958  | 6 | 152372366 |
| rs2982705  | 6 | 152389551 |
| rs3020422  | 6 | 152390451 |
| rs6941035  | 6 | 152420394 |
| rs9341016  | 6 | 152423691 |
| rs2273206  | 6 | 152424004 |
| rs2273207  | 6 | 152424018 |
| rs2207396  | 6 | 152424075 |

|       |            |    |           |
|-------|------------|----|-----------|
|       | rs3798571  | 6  | 152426493 |
|       | rs3778080  | 6  | 152426929 |
|       | rs3778081  | 6  | 152428321 |
|       | rs3798573  | 6  | 152431055 |
|       | rs3020375  | 6  | 152431661 |
|       | rs9479191  | 6  | 152434853 |
|       | rs3778089  | 6  | 152435454 |
|       | rs3822990  | 6  | 152447658 |
|       | rs750686   | 6  | 152449819 |
|       | rs9341038  | 6  | 152451346 |
|       | rs9322359  | 6  | 152451715 |
|       | rs2228480  | 6  | 152461788 |
|       | rs3798577  | 6  | 152462823 |
|       | rs9341074  | 6  | 152464148 |
|       | rs2813544  | 6  | 152467275 |
|       | rs1543403  | 6  | 152470397 |
| FGFR1 | rs2288696  | 8  | 38405382  |
|       | rs10108561 | 8  | 38410369  |
|       | rs2978073  | 8  | 38414699  |
|       | rs11777067 | 8  | 38417804  |
|       | rs4733946  | 8  | 38438506  |
|       | rs6996321  | 8  | 38441503  |
|       | rs12677355 | 8  | 38449100  |
| FGFR2 | rs10749418 | 10 | 123225051 |
|       | rs1649163  | 10 | 123230277 |
|       | rs1649202  | 10 | 123230615 |
|       | rs3135819  | 10 | 123231112 |
|       | rs3135810  | 10 | 123232770 |
|       | rs2278202  | 10 | 123233187 |
|       | rs1649200  | 10 | 123233720 |
|       | rs3135807  | 10 | 123234667 |
|       | rs1613776  | 10 | 123234824 |
|       | rs2433759  | 10 | 123242522 |
|       | rs2912753  | 10 | 123247392 |
|       | rs3135785  | 10 | 123249997 |
|       | rs3135734  | 10 | 123314879 |
|       | rs2912787  | 10 | 123315528 |
|       | rs2981449  | 10 | 123315745 |
|       | rs3135730  | 10 | 123315784 |
|       | rs2981432  | 10 | 123316636 |
|       | rs10736303 | 10 | 123324447 |
|       | rs3116478  | 10 | 123325790 |
|       | rs3135715  | 10 | 123344716 |
| FGF3  | rs948133   | 11 | 69332787  |
|       | rs12577891 | 11 | 69332822  |
|       | rs10908228 | 11 | 69336099  |
|       | rs11263591 | 11 | 69338136  |

|       |            |    |           |
|-------|------------|----|-----------|
|       | rs3895665  | 11 | 69346074  |
|       | rs3892955  | 11 | 69346602  |
|       | rs11263596 | 11 | 69346904  |
| PVRL1 | rs4459318  | 11 | 119046988 |
|       | rs10790332 | 11 | 119058888 |
|       | rs4936492  | 11 | 119065659 |
|       | rs11217400 | 11 | 119065990 |
|       | rs11217408 | 11 | 119069693 |
|       | rs11217409 | 11 | 119069706 |
|       | rs7950059  | 11 | 119070705 |
|       | rs1467051  | 11 | 119073511 |
|       | rs7945395  | 11 | 119074947 |
|       | rs7945424  | 11 | 119075012 |
|       | rs10892434 | 11 | 119078599 |
|       | rs715849   | 11 | 119080934 |
|       | rs4938717  | 11 | 119082121 |
|       | rs12421432 | 11 | 119109057 |
|       | rs12421434 | 11 | 119109077 |
| TGFB3 | rs4252348  | 14 | 75494617  |
|       | rs2284791  | 14 | 75498789  |
|       | rs3917203  | 14 | 75499082  |
|       | rs3917202  | 14 | 75499224  |
|       | rs3917201  | 14 | 75499308  |
|       | rs3917180  | 14 | 75505698  |
|       | rs3917148  | 14 | 75516274  |
|       | rs11466414 | 14 | 75517603  |
| FGF7  | rs16962445 | 15 | 47506171  |
|       | rs2413944  | 15 | 47524043  |
|       | rs17478618 | 15 | 47524110  |
|       | rs16962490 | 15 | 47530920  |
|       | rs17479003 | 15 | 47532712  |
|       | rs10519227 | 15 | 47533656  |
|       | rs7167041  | 15 | 47542036  |
|       | rs4480740  | 15 | 47543134  |
|       | rs12148764 | 15 | 47543373  |
| CBS   | rs8133239  | 21 | 43342773  |
|       | rs466791   | 21 | 43343023  |
|       | rs2839631  | 21 | 43343155  |
|       | rs719038   | 21 | 43344013  |
|       | rs2124458  | 21 | 43348749  |
|       | rs2124459  | 21 | 43348783  |
|       | rs9325622  | 21 | 43352770  |
|       | rs11203172 | 21 | 43353184  |
|       | rs4920037  | 21 | 43354960  |
|       | rs1789953  | 21 | 43356005  |
|       | rs234706   | 21 | 43358419  |
| TBX1  | rs9618681  | 22 | 18119390  |

|  |            |    |          |
|--|------------|----|----------|
|  | rs11912973 | 22 | 18120562 |
|  | rs2238776  | 22 | 18137892 |
|  | rs4819522  | 22 | 18146782 |
